# Supplementary material
Source: publisher figshare collection journal article supplement (https://acs.figshare.com/ndownloader/files/4414582)
Supplement: Supplementary file 1 [file 4414582]

# Supporting Information

## Novel Process of Simultaneous Removal of SO<sub>2</sub> and NO<sub>2</sub> by Sodium Humate Solution

Guoxin Hu<sup>\*†</sup>, Zhiguo Sun<sup>†</sup>, [Hanyang Gao<sup>‡</sup>](#)

School of Mechanical & Power Engineering, Shanghai Jiaotong University, Shanghai 200240, China, [and](#)

[School of Environmental Science & Engineering, Shanghai Jiaotong University, Shanghai 200240, China](#)

- 3 pages
- 1 table
- 3 figures

---

<sup>\*</sup> Corresponding author phone/fax: +86-21-34206569; E-mail: [hugx@sjtu.edu.cn](mailto:hugx@sjtu.edu.cn).

<sup>†</sup> School of Mechanical & Power Engineering, Shanghai Jiaotong University

<sup>‡</sup> School of Environmental Science & Engineering, Shanghai Jiaotong University

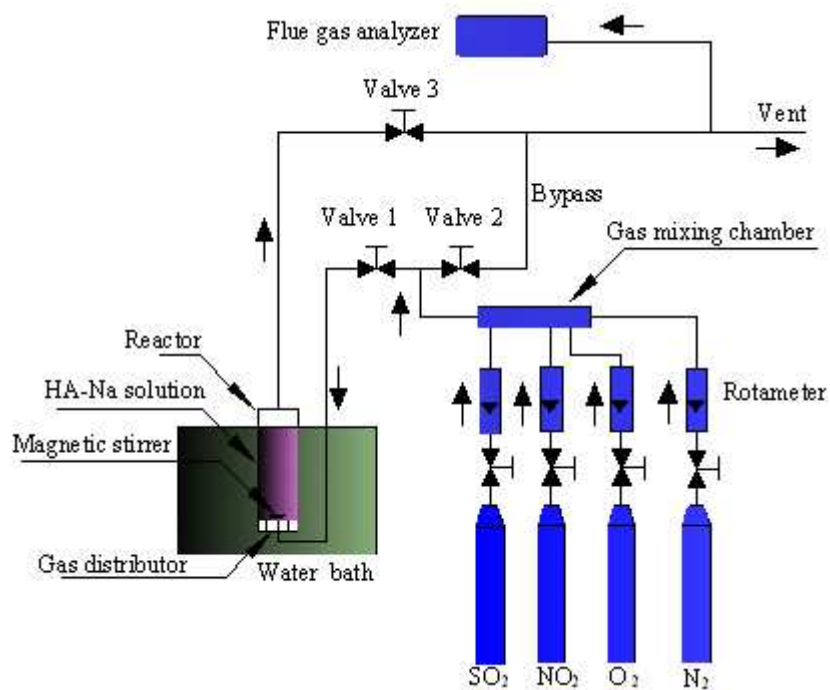

FIGURE S1. Schematic diagram of the experimental apparatus

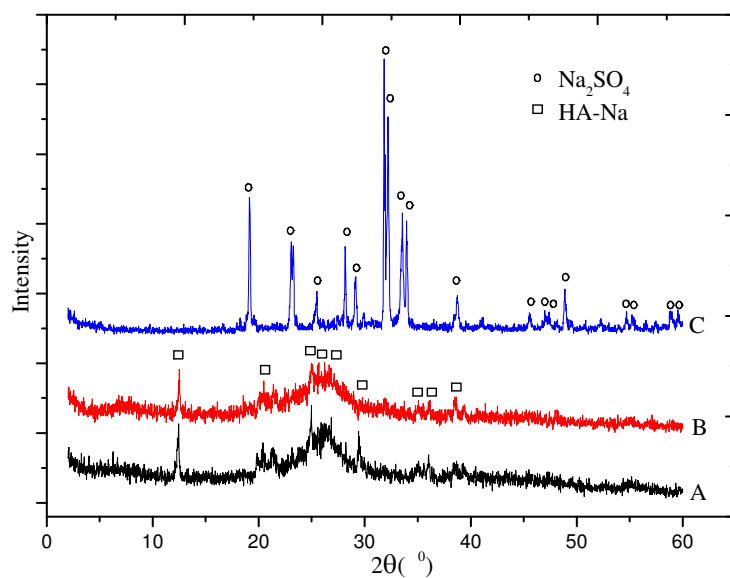

FIGURE S2. XRD diagrams of A.HA-Na; B. product of desulfurization and denitrification for cycle 10; C. Crystal resulting from the absorption liquid.

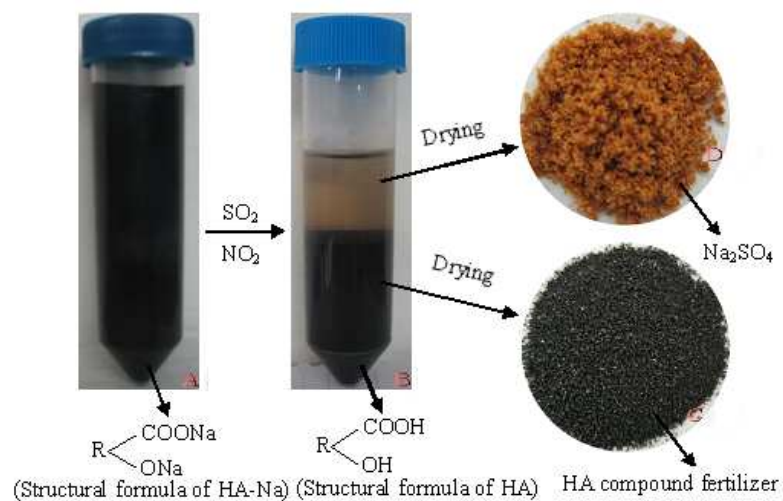

**FIGURE S3. Photo of A. HA-Na solution; B. desulfurization and denitrification liquid; C. HA compound fertilizer; and D.  $\text{Na}_2\text{SO}_4$ .**

**TABLE S1. Content of HA Compound Fertilizer**

| sample   | N    | C     | S    | H    | O     |
|----------|------|-------|------|------|-------|
| HA-Na    | 0.94 | 44.21 | 1.10 | 2.67 | 51.08 |
| cycle 4  | 1.19 | 49.03 | 2.72 | 2.26 | 44.80 |
| cycle 6  | 1.27 | 48.70 | 3.13 | 2.01 | 44.89 |
| cycle 10 | 1.07 | 45.33 | 2.91 | 2.20 | 48.49 |
